# Supplementary material for: Overexpression of ICAM-1 Predicts Poor Survival in High-Grade Serous Ovarian Carcinoma: A Study Based on TCGA and GEO Databases and Tissue Microarray
Source: Hindawi journal article supplement (doi:10.1155/2019/2867372), 2019-06-13
Supplement: f1 [file 2867372.f1.pdf]

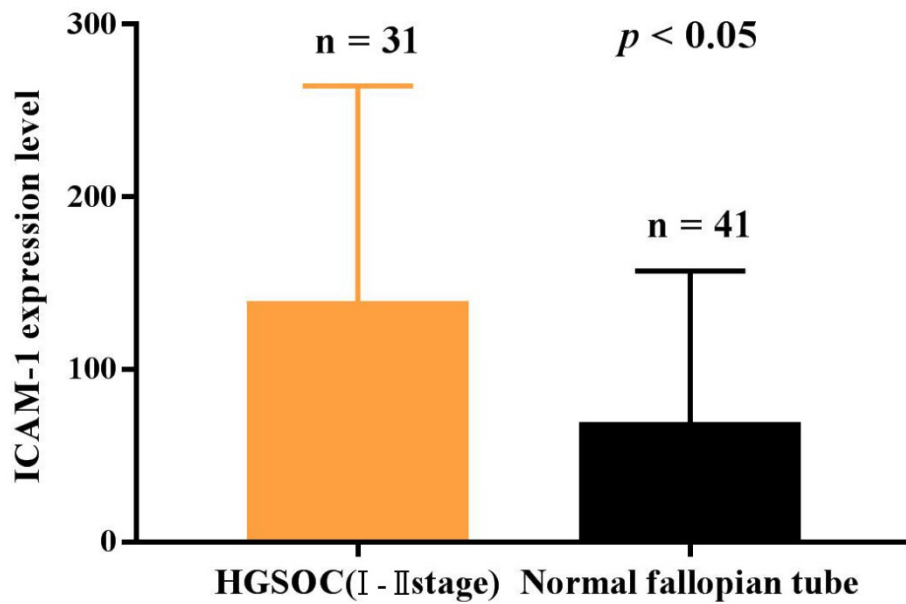

223

224 [Supplementary Figure 1: Analysis of ICAM-1 expression in high-grade serous ovarian carcinoma \( I - II stage\)](#)

225 [and normal fallopian tube microarray tissues. ICAM-1 levels were higher in high-grade serous ovarian](#)

226 [carcinoma \( I - II stage\) samples than in normal samples \( \$P < 0 .05\$ \).](#)
